# Supplementary material
Source: PubMed Central journal article supplement (PMC4252980)
Supplement: NIHMS632646-supplement-2.pdf [file NIHMS632646-supplement-2.pdf]

## Supporting Information for

### Self-assembled Nanoscale Coordination Polymers Carrying siRNAs and Cisplatin for Effective Treatment of Resistant Ovarian Cancer

Chunbai He, Demin Liu, Wenbin Lin\*

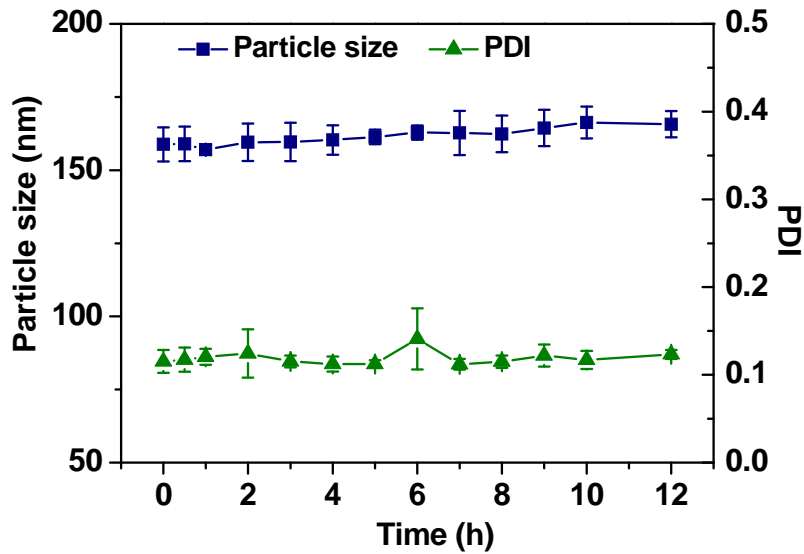

**Figure S1** Stability of NCP-1/siRNAs as judged by particle sizes and PDI's in PBS containing 5 mg/mL BSA at 37 °C.

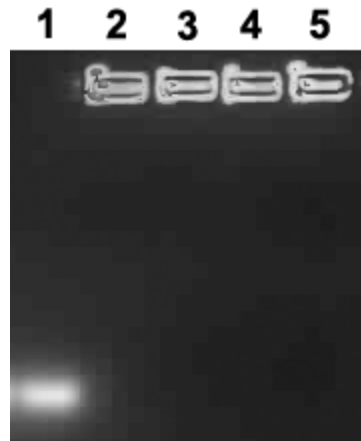

**Figure S2** Gel retardation of NCP-1/siRNA (2% agarose gel, 56 V, 1 h). Lane 1-5: free siRNA, NCP-1/siRNAs, NCP-1/*sisurvivin*, NCP-1/*siBcl-2*, and NCP-1/*siP-gp*.

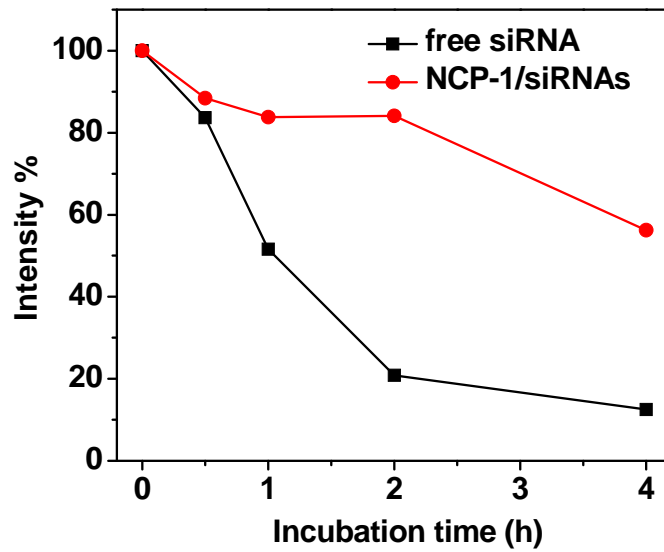

**Figure S3** Degradation of siRNA in its free form and loaded into NCP-1 upon incubating with FBS for 4 hours.

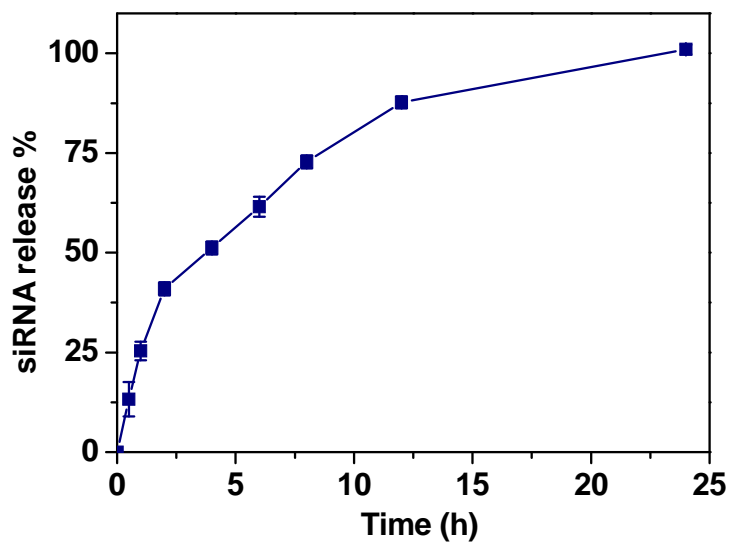

**Figure S4** Cumulative release of siRNA from NCP-1/siRNAs in PBS determined by fluorimetry (n = 3).

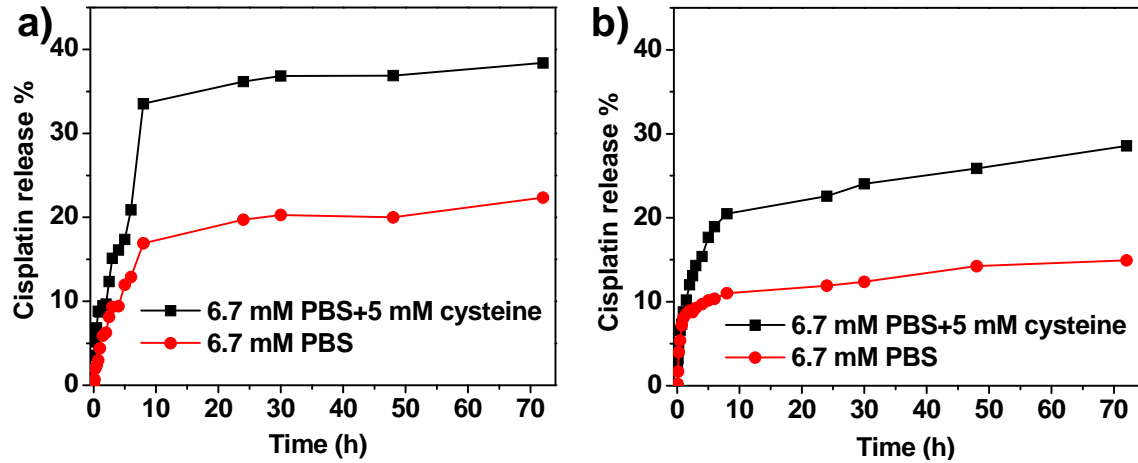

**Figure S5** In vitro release of cisplatin from NCP-1 (a) and NCP-1/siRNAs (b) in 6.7 mM PBS and 6.7 mM PBS supplemented with 5 mM cysteine.

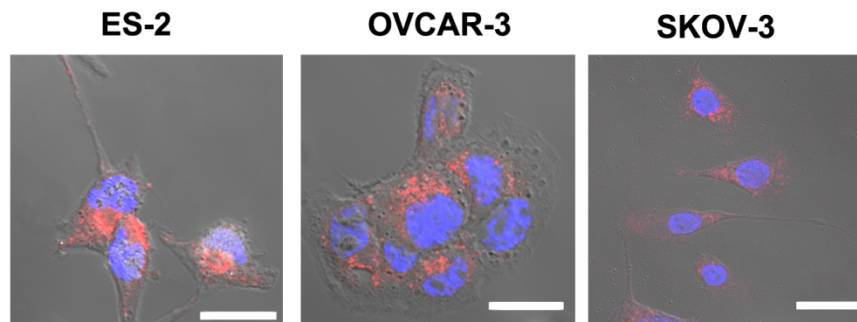

**Figure S6** CLSM images showing siRNA (TAMRA-labeled, red fluorescence) could be efficiently delivered to ovarian cancer cells by NCP-1/siRNA. The nuclei were stained by DAPI. Bar represented 20  $\mu\text{m}$ .

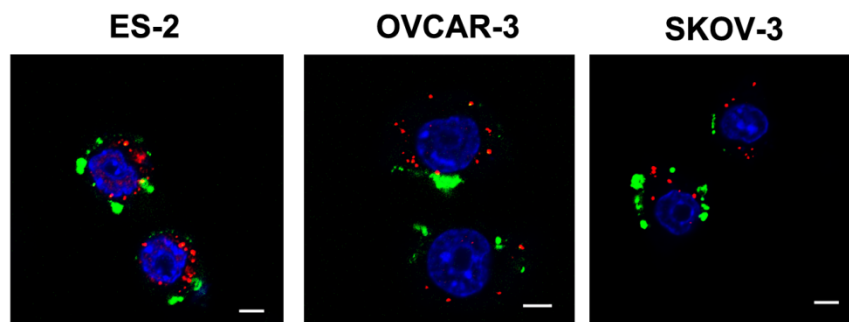

**Figure S7** siRNA (TAMRA-labeled, red fluorescence) successfully escaped from endosome entrapment. Endosome/lysosome and nuclei were stained with LysoTracker Green and DAPI, respectively. Bar represented 5  $\mu\text{m}$ .

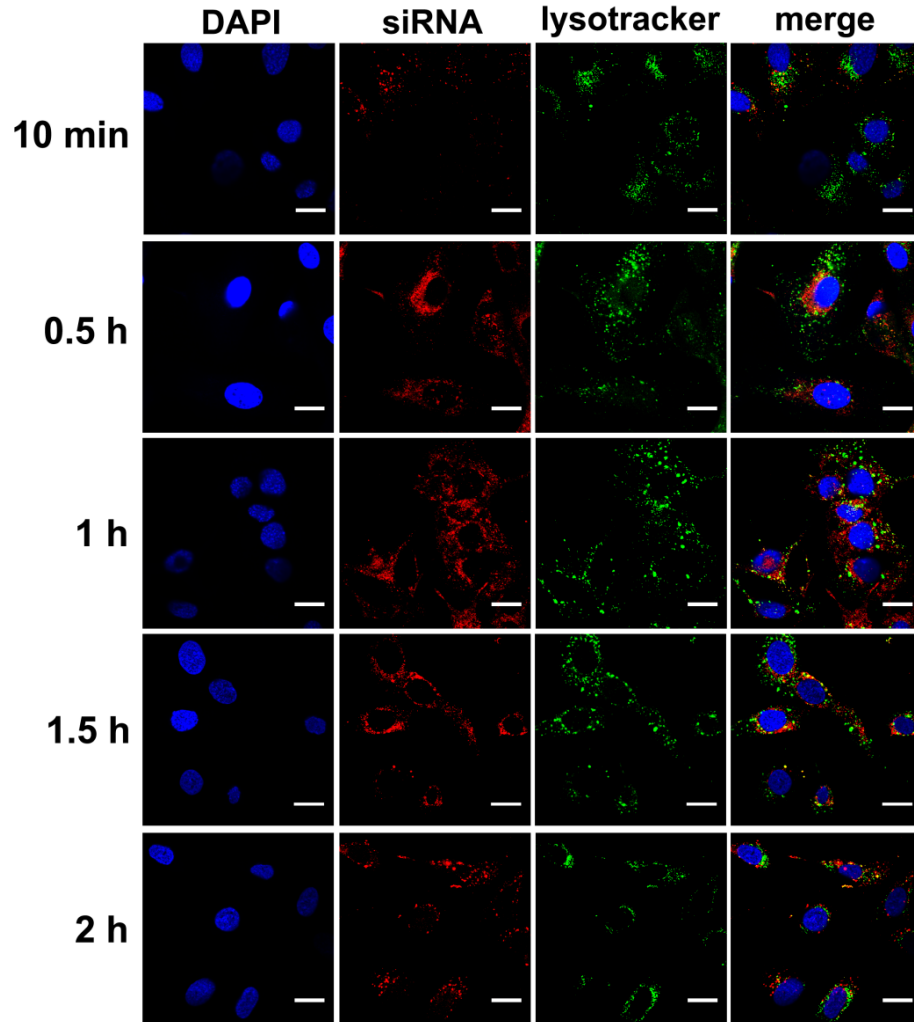

**Figure S8** Time-dependent endosomal escape of siRNA loaded in NCP-1 in SKOV-3 cells. Endosome/lysosome and nuclei were stained with Lysotracker Green and DAPI, respectively. Bar represented 20  $\mu$ m.

**Table S1** Primer sequences of  $\beta$ -actin, Bcl-2, survivin, and P-gp for Real-Time PCR.

|                | <b>Primer F</b>                | <b>Primer R</b>                |
|----------------|--------------------------------|--------------------------------|
| $\beta$ -actin | 5'-CCACCCATGGCAAATTCATGGCA-3'  | 5'-TCTAGACGGCAGGTCAGGTCCACC-3' |
| Bcl-2          | 5'-GTGGAGGAGCTCTTCAGGGA-3'     | 5'-AGGCACCCAGGGTGATGCAA-3'     |
| survivin       | 5'-GGCATGGGTGCCCGACGTT-3'      | 5'-AGAGGCCTCAATCCATGGCA-3'     |
| P-gp           | 5'-AGGAAGCCAATGCCTATGACTTTA-3' | 5'-CAACTGGGCCCTCTCTCTC-3'      |

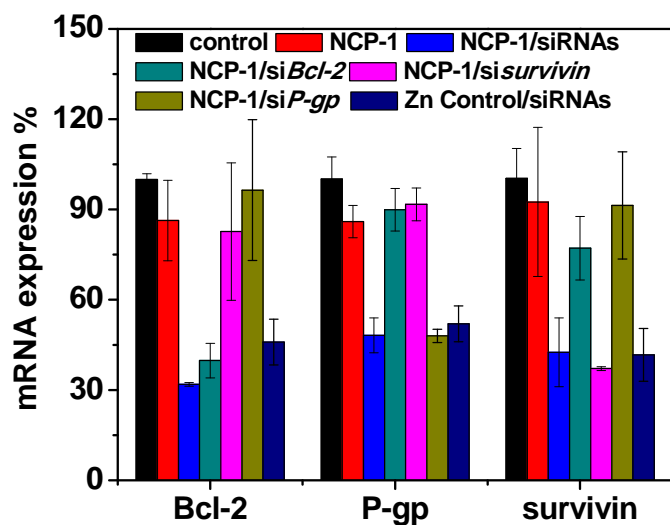

**Figure S9** mRNA expression levels of Bcl-2, P-gp, and survivin in SKOV-3 cells transfected with NCP-1, NCP-1/siRNAs, NCP-1/si*urvivin*, NCP-1/si*Bcl-2*, NCP-1/si*P-gp*, and Zn control/siRNAs at an siRNA concentration of 30 nM (n=3).

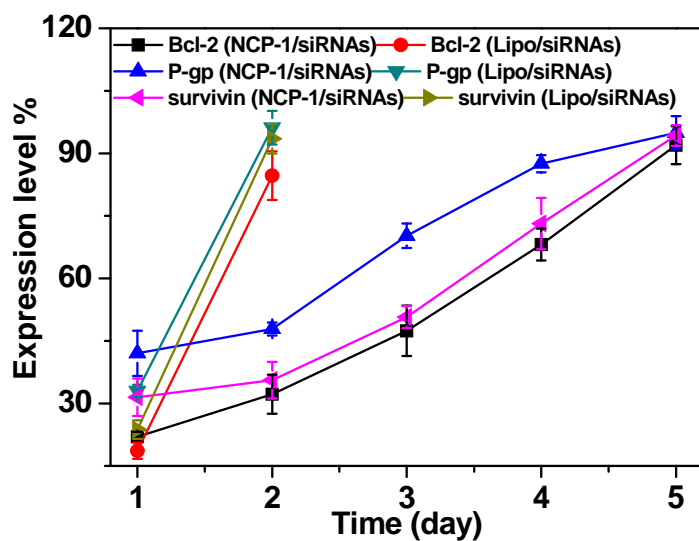

**Figure S10** Time-dependent transfection efficiency mediated by NCP-1/siRNAs and Lipo/siRNAs in SKOV-3 cells (n=3).

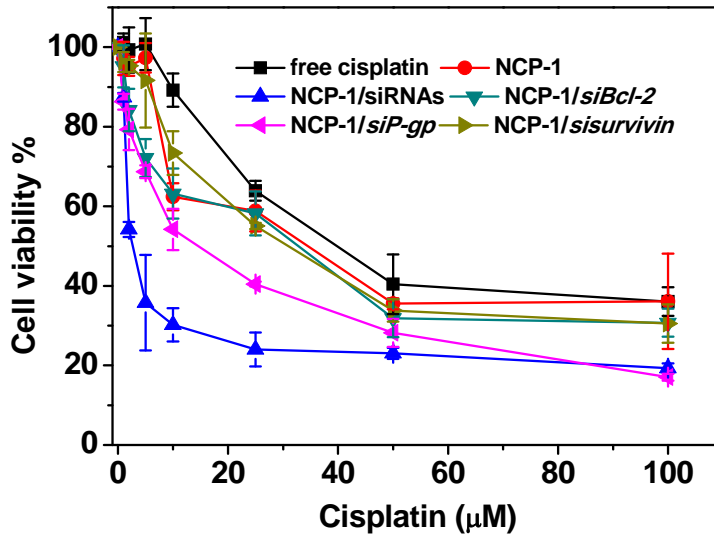

**Figure S11** Cytotoxicity of NCP-1/siRNA in ES-2 cells. The cells were incubated with NCP-1/siRNA, NCP-1, or free cisplatin for 72 h followed by the MTS assay.

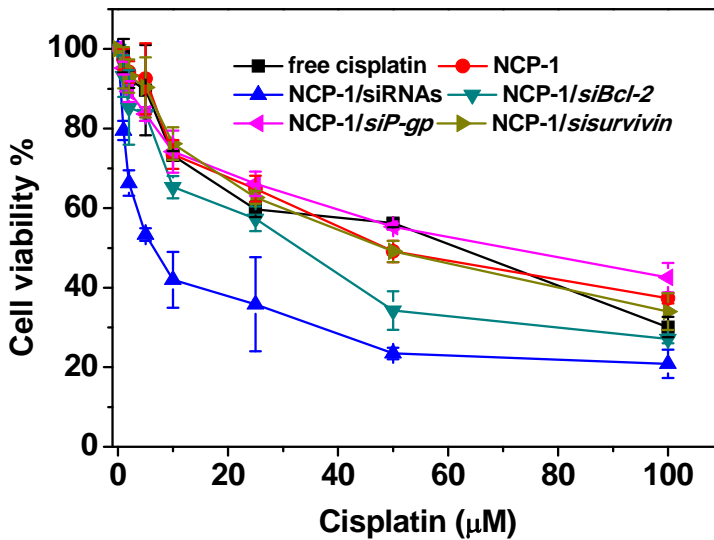

**Figure S12** Cytotoxicity of NCP-1/siRNA in OVCAR-3 cells. The cells were incubated with NCP-1/siRNA, NCP-1, or free cisplatin for 72 h followed by the MTS assay.

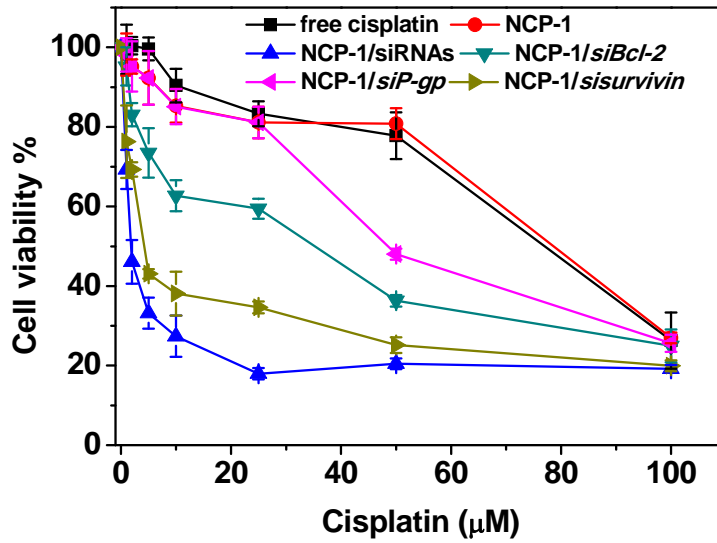

**Figure S13** Cytotoxicity of NCP-1/siRNA in SKOV-3 cells. The cells were incubated with NCP-1/siRNA, NCP-1, or free cisplatin for 72 h followed by the MTS assay.

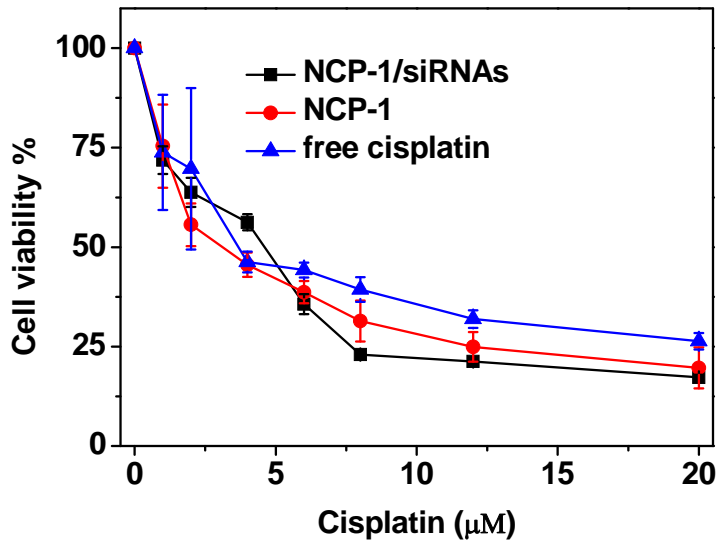

**Figure S14** Cytotoxicity of NCP-1/siRNA in A2780 cells. The cells were incubated with NCP-1/pooled siRNAs, NCP-1, or free cisplatin for 72 h followed by the MTS assay.

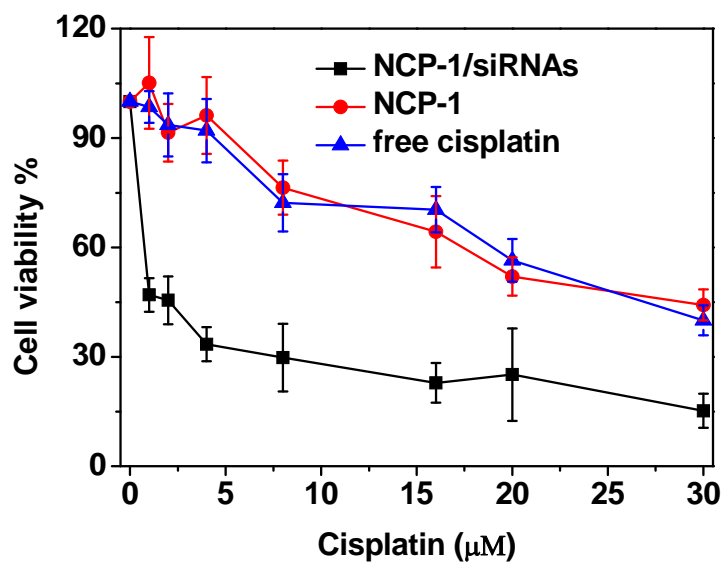

**Figure S15** Cytotoxicity of NCP-1/siRNA in A2780/CDDP cells. The cells were incubated with NCP-1/pooled siRNAs, NCP-1, or free cisplatin for 72 h followed by the MTS assay.



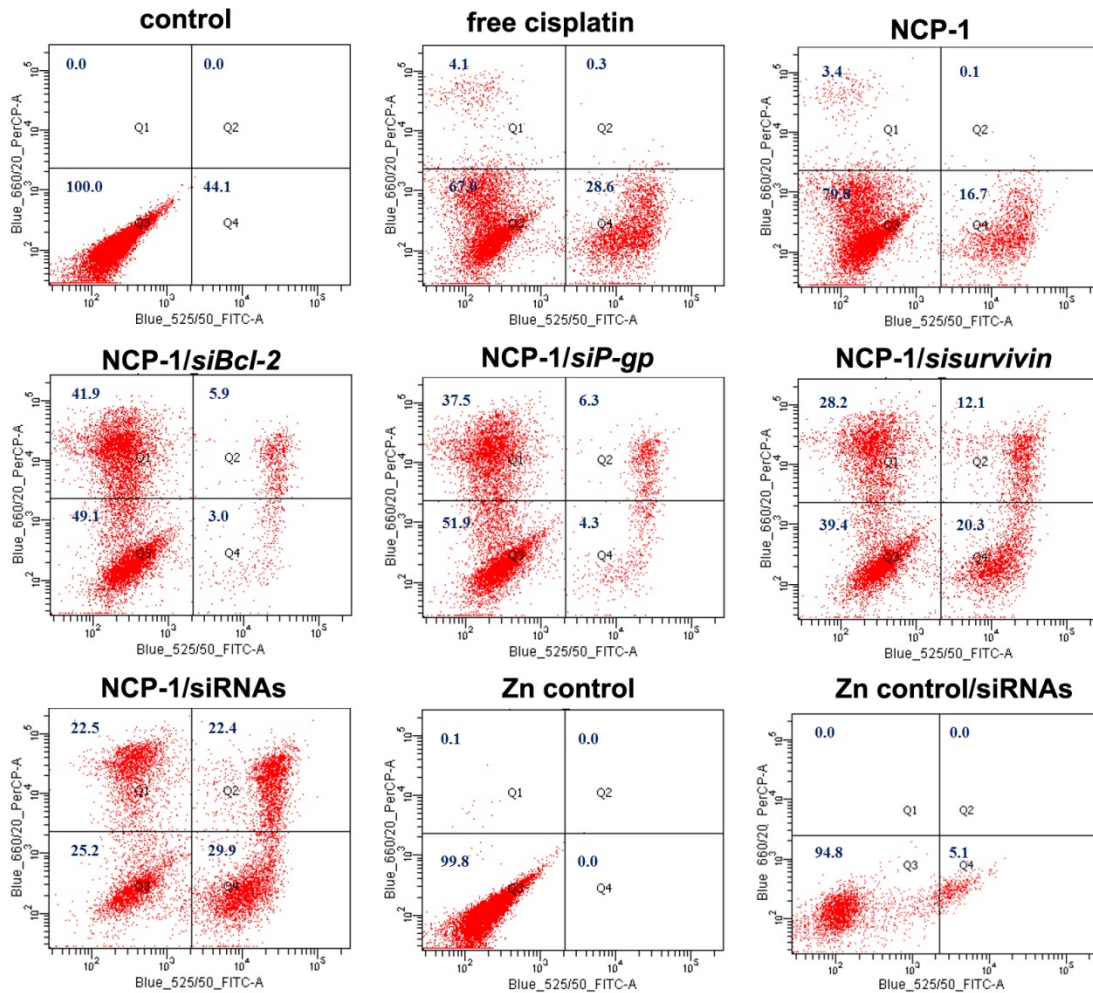

**Figure S16** Annexin V/PI analysis of SKOV-3 cells after the incubation with saline (control), NCP-1, NCP-1/siRNAs, Zn control, **Zn control/siRNAs**, and free cisplatin for 24 h. The Q1-Q4 quadrants represent necrosis, late apoptotic, healthy, and early apoptotic cells, respectively. The percent of cells in each quadrant was shown on the graphs.

**Table S2** Percent of healthy, apoptotic, and necrotic SKOV-3 cells after the treatment of saline (control), NCP-1, NCP-1/siRNAs, Zn control, Zn control/siRNAs, and free cisplatin for 24 h.

|                          | Healthy (%) | Apoptosis (%) | Necrosis (%) |
|--------------------------|-------------|---------------|--------------|
| Control                  | 100.0       | 0.0           | 0.0          |
| Free cisplatin           | 67.0        | 28.9          | 4.1          |
| NCP-1                    | 79.8        | 16.8          | 3.4          |
| NCP-1/ <i>siBcl-2</i>    | 49.1        | 8.9           | 41.9         |
| NCP-1/ <i>siP-gp</i>     | 51.9        | 10.6          | 37.5         |
| NCP-1/ <i>sisurvivin</i> | 39.4        | 32.4          | 28.2         |
| NCP-1/siRNAs             | 25.2        | 52.3          | 22.5         |
| Zn Control               | 99.8        | 0.0           | 0.1          |
| <b>Zn Control/siRNAs</b> | <b>94.8</b> | <b>5.1</b>    | <b>0.0</b>   |

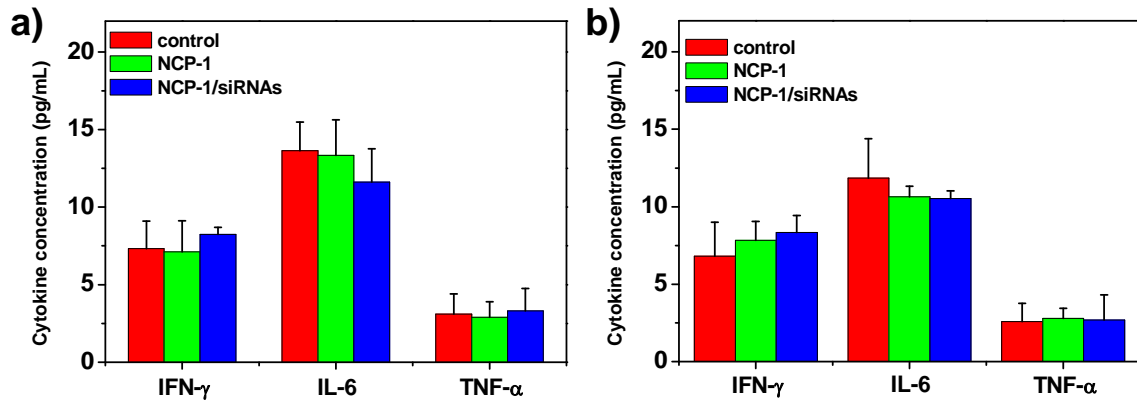

**Figure S17** Immunogenic response of NCP-1 and NCP-1/pooled siRNAs in SKOV-3 (a) and Raw 264.7 (b) cells. The cells were incubated with NCP-1 or NCP-1/siRNAs for 72 h followed by the determination of TNF- $\alpha$ , IL-6, and IFN- $\gamma$  by ELISA.

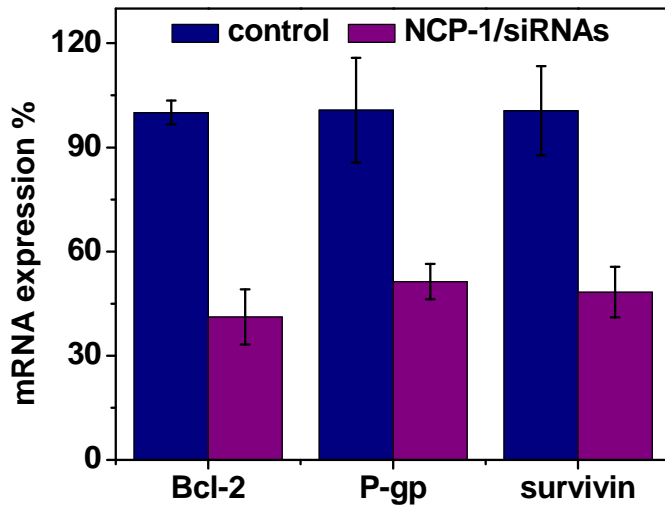

**Figure S18** mRNA expression levels of Bcl-2, P-gp, and survivin in the tumors of mice receiving intratumoral injection of NCP-1/siRNAs (n=3).

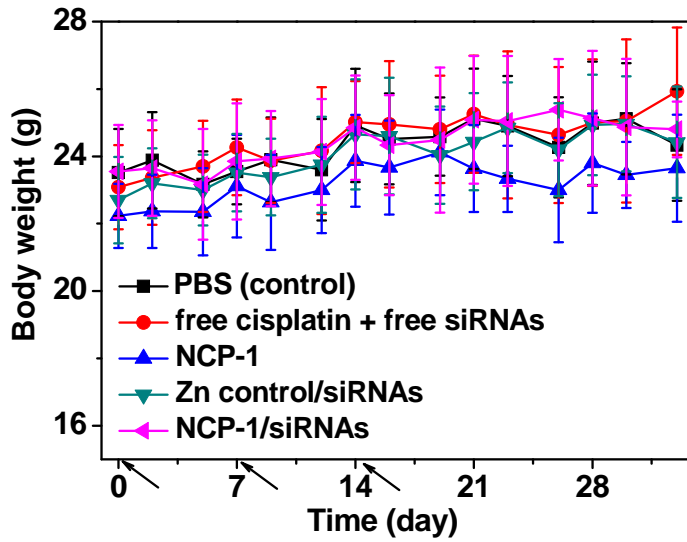

**Figure S19** Body weights of SKOV-3 tumor bearing mice after the treatment with NCP-1/pooled siRNAs (n=6).

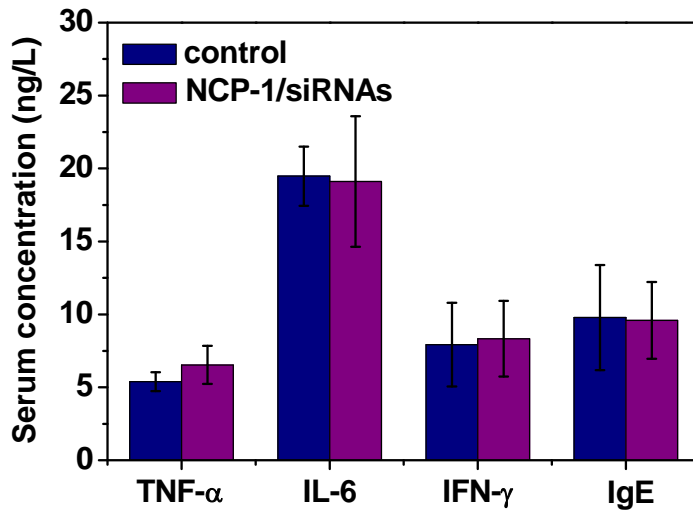

**Figure S20** TNF- $\alpha$ , IL-6, IFN- $\gamma$ , and IgE concentrations in the serum of SKOV-3 tumor bearing mice receiving intratumoral injection of NCP-1/siRNAs or PBS (control) determined by ELISA.

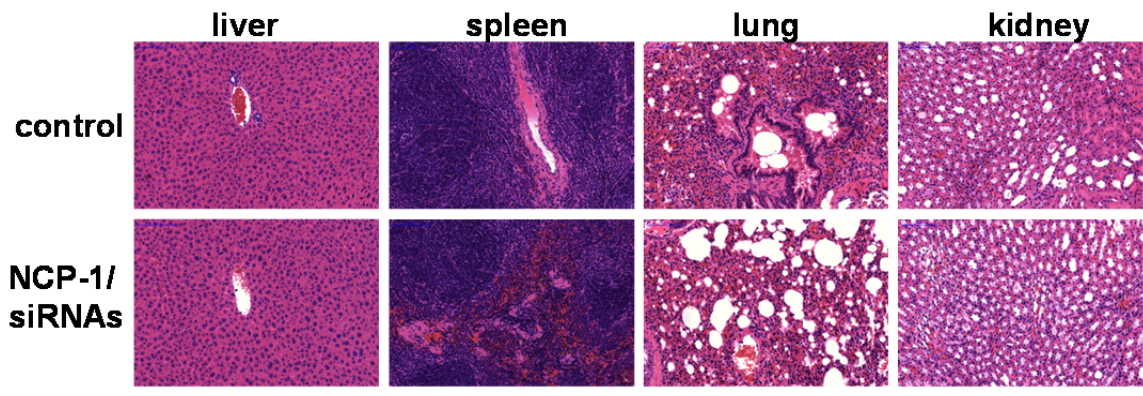

**Figure S21** Histological sections of excised organs from SKOV-3 tumor bearing mice in the groups of control (PBS) and NCP-1/siRNAs. Bar: 1 mm.
